# Supplementary material for: Facile synthesis of Si/C composites for high-performance lithium-ion battery anodes
Source: Royal Society of Chemistry journal article supplement (doi:10.1039/d4nr04463k), 2025-01-01
Supplement: d4nr04463k1.pdf [file d4nr04463k1.pdf]

**Facile synthesis of Si/C composite for high-performance lithium-ion battery anodes**

**Jiasheng Chen<sup>1,3</sup>(0000-0002-5115-032X), Xuanliang Wang<sup>1</sup>(0009-0006-8690-6736),  
Zhaoping Deng<sup>3</sup>(0000-0002-9442-0940), Eun Mi Kim<sup>1,2\*</sup>(0000-0002-3100-1554), Sang Mun  
Jeong<sup>1,2\*</sup>(0000-0002-3694-3110)**

*<sup>1</sup>Department of Chemical Engineering, Chungbuk National University, 1 Chungdae-ro, Seowon-Gu, Cheongju, Chungbuk 28644, Republic of Korea*

*<sup>2</sup>Advanced Energy Research Institute, Chungbuk National University, 1 Chungdae-ro, Seowon-Gu, Cheongju, Chungbuk 28644, Republic of Korea*

*<sup>3</sup>School of Science, Xichang University, Xichang 615013, Sichuan, China*

\*Email: smjeong@chungbuk.ac.kr (S.M. Jeong); jinenmei@chungbuk.ac.kr (E. M. Kim)

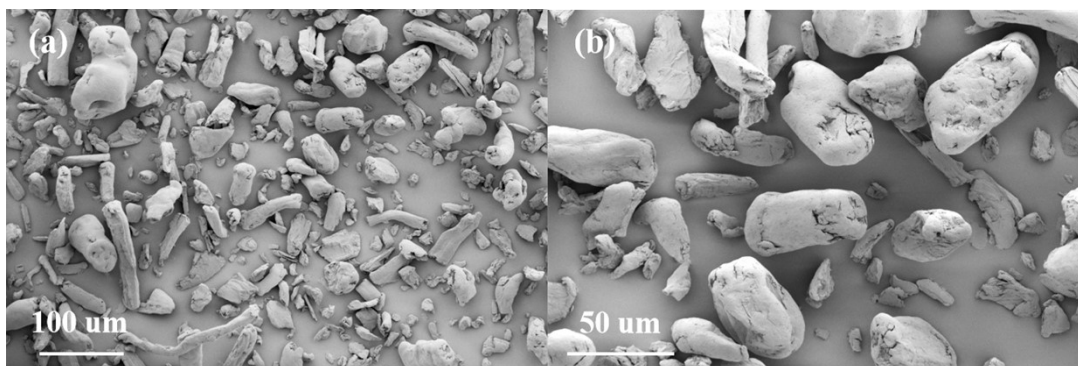

Fig. S1. FE-SEM images of (a, b) Silicon dioxide ( $\text{SiO}_2$ )

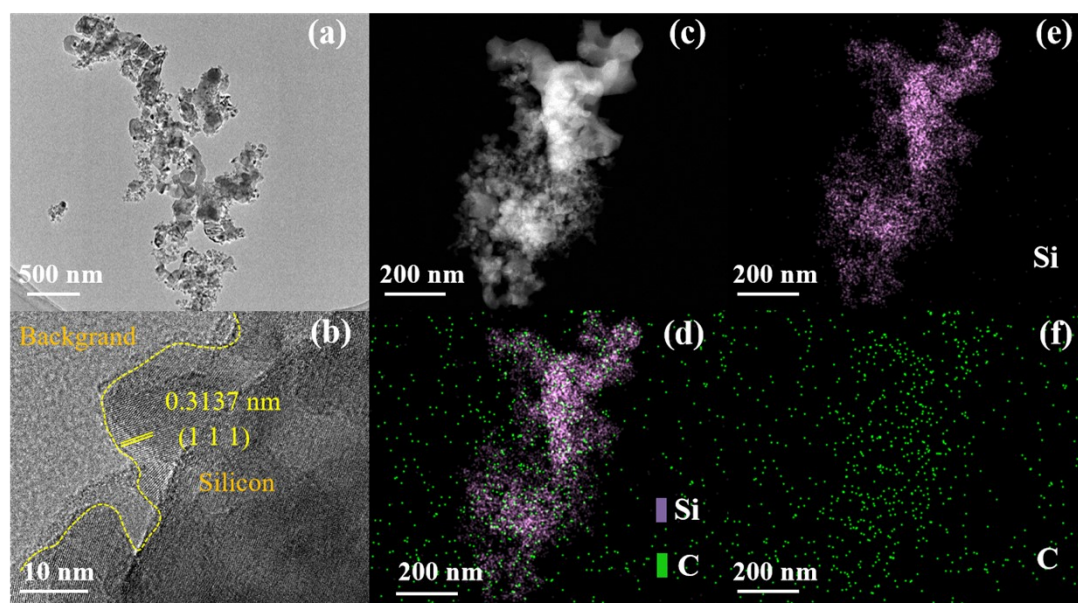

Fig. S2. (a) TEM, (b) HR-TEM, and (c-f) EDS elemental mapping images of Si/OC

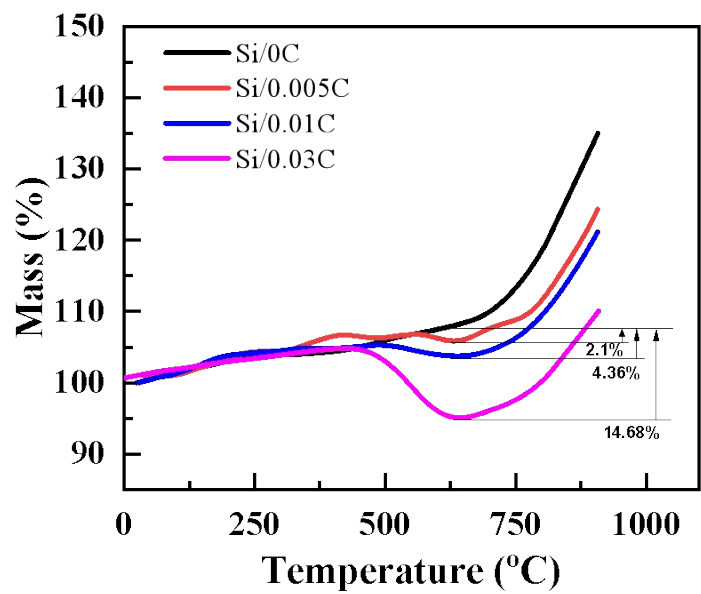

Fig. S3. Thermogravimetric (TG) of Si/C nanopowders with different silicon-to-carbon ratios.

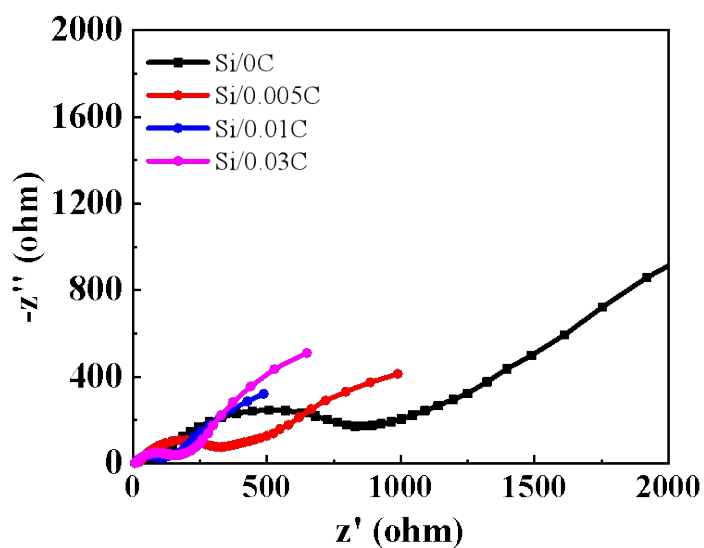

Fig. S4. Nyquist curves of Si/C electrodes with different silicon-to-carbon ratios after rate and cycling performance tests.
